# Supplementary material for: Neonatal oral fluid as a transmission route for bifidobacteria to the infant gut immediately after birth
Source: PubMed Central journal article supplement (PMC6582144; doi:10.1038/s41598-019-45198-9), 2019-06-18
Supplement: 41598_2019_45198_MOESM1_ESM.pdf [file 41598_2019_45198_MOESM1_ESM.pdf]

## **Supplementary information**

### **Title**

Neonatal oral fluid as a transmission route for bifidobacteria to the infant gut immediately after birth

### **Author names**

Kazuya Toda 1\*, Ken Hisata 2, Takumi Satoh 3, Noriko Katsumata 1, Toshitaka Odamaki 1, Eri Mitsuyama 1, Takane Katayama 4, Tetsuya Kuhara 1, Kohzo Aisaka 5, Toshiaki Shimizu 2, Jin-zhong Xiao 1.

### **Affiliation**

1: Next Generation Science Institute R&D Division, Morinaga Milk Industry Co., Ltd., Kanagawa 252-8583, Japan

2: Department of Pediatrics and Adolescent Medicine, Juntendo University Graduate School of Medicine, Tokyo 113-8421, Japan

3: Department of Molecular Microbiology, Tokyo University of Agriculture, Tokyo 183-0051, Japan

4: Division of Integrated Life Science, Graduate School of Biostudies, Kyoto University, Sakyo-ku, Kyoto 606-8502, Japan

5: Department of Obstetrics and Gynecology, Hamada Hospital, Tokyo 101-0062, Japan

### **Corresponding author**

\*Corresponding author: Tel.: +81-462-52-3067, Fax: +81-462-52-3077

### **E-mail addresses**

Corresponding author: [kazuya-toda983@morinagamilk.co.jp](mailto:kazuya-toda983@morinagamilk.co.jp)

### **The list of supplemental data**

Supplemental Table 1. Cell numbers of total bacteria and bifidobacteria in OF samples.

Supplemental Table 2. Cluster analysis of RAPD pattern profiles.

Supplemental Table 3. Detailed information of isolated strains from OF, IF and MF samples.

Supplemental Table 4. ANI values for candidate strains.

Supplemental Table 5. Detailed information on the subjects.

Supplemental Table 6. Detailed results of 16S rRNA gene sequence analysis at the

phylum level.

Supplemental Table 7. Detailed results of 16S rRNA gene sequence analysis at the genus level.

Supplemental Table 8. List of primer sets.

**Supplemental Table 1. Cell numbers of total bacteria and bifidobacteria in OF samples.**

| ID     | OF             |     |                   |                  |                 |     |     |      |     | IF  |      |
|--------|----------------|-----|-------------------|------------------|-----------------|-----|-----|------|-----|-----|------|
|        | Precultivation |     |                   |                  | Postcultivation |     |     |      |     |     |      |
|        | Inoculum       |     | Inoculation ratio | Calculated value |                 | BM  |     | YCFA |     |     |      |
| Target | T              | B   |                   | T                | B               | T   | B   | T    | B   | T   | B    |
| 1      | 6              | 4.8 | 0.20%             | 3.3              | 2.1             | 7.5 |     | 7.2  |     | 8.5 | 10.1 |
| 2      | 4.8            |     | 0.20%             | 2.1              |                 | 7.3 |     | 7.1  | 6.8 | 9   | 10.3 |
| 3      | 5.9            | 6.4 | 0.10%             | 2.9              | 3.4             | 8.5 | 9   | 8.6  | 7.8 | 8   | 9    |
| 4      | 5.4            |     | 0.20%             | 2.7              |                 | 8   |     | 9    |     | 7.6 |      |
| 5      | 5.4            |     | 0.20%             | 2.7              |                 | 7.4 | 6.1 | 8.9  |     | 8   | 8.9  |
| 6      | 5.6            | 4.5 | 0.10%             | 2.6              | 1.5             | 8.5 |     | 8.6  |     | 7.7 |      |
| 7      | 6              |     | 0.10%             | 3                |                 | 9.1 | 9.1 | 8.9  | 5.9 | 7.8 | 8.9  |
| 8      | 6.9            | 6.7 | 0.20%             | 4.2              | 4               | 8.6 | 6.8 | 8.1  | 5   | 8.8 | 10.1 |
| 9      | 6.7            | 4.2 | 0.20%             | 4                | 1.5             | 8.6 |     | 8.8  | 6.7 | 8.8 | 10   |
| 10     | 6.2            | 4.2 | 0.20%             | 3.5              | 1.5             | 8.3 |     | 8.5  | 5.4 | 9.1 | 10.5 |
| 11     | 6.4            | 4.3 | 0.10%             | 3.4              | 1.3             | 5.8 |     | 8.7  |     | 8.3 | 9.2  |
| 12     | 6.3            | 4.8 | 0.20%             | 3.6              | 2.1             | 9.2 | 9.1 | 9.2  | 8.8 | 8.8 | 9.8  |
| 13     | 4.9            |     | 0.20%             | 2.2              |                 | 8.4 | 8.1 | 9.2  | 7.6 | 7.6 | 8.2  |
| 14     | 4.8            |     | 0.20%             | 2.1              |                 | 8.2 | 4.2 | 9    | 5.4 | 8.1 |      |
| 15     | 4.5            |     | 0.10%             | 1.5              |                 | 8.2 | 5.5 | 8.2  |     | 8.5 | 9.6  |

The values indicate the cell numbers (Log/mL or g).

Target shown as: T, total cell numbers; or B, *Bifidobacterium*.



**Supplemental Table 3. Detailed information of isolated strains from OF, IF and MF samples.**

| Label   | Family No. | Isolation Source    | Species                     | Total Sequence Length (Mbp): | Number of Sequences: | Longest Sequences (bp): | N50 (bp): | Gap Ratio (%): | GC content (%): | Number of CDSs: | Average Protein Length: | Coding Ratio (%): | Number of rRNAs: | Number of tRNAs: | Number of CRISPRs: | Cultivation Medium | Carbon source in TOS Agar Plate | DDBJ accession number     | Morinaga Culture Collection (MCC) number |
|---------|------------|---------------------|-----------------------------|------------------------------|----------------------|-------------------------|-----------|----------------|-----------------|-----------------|-------------------------|-------------------|------------------|------------------|--------------------|--------------------|---------------------------------|---------------------------|------------------------------------------|
| ID01IF1 | 1          | Infant feces        | <i>B. infantis</i>          | 2.67                         | 76                   | 164760                  | 94009     | 0.0075         | 59.8            | 2334            | 323.4                   | 84.7              | 2                | 58               | 0                  | -                  | Galactooligosaccharide          | BJIA01000001-BJIA01000076 | MCC-01971                                |
| ID02IF1 | 2          | Infant feces        | <i>B. bifidum</i>           | 2.22                         | 45                   | 242612                  | 118940    | 0.005          | 62.8            | 1868            | 337.9                   | 85.2              | 1                | 55               | 1                  | -                  | Galactooligosaccharide          | BJIB01000001-BJIB01000045 | MCC-01946                                |
| ID02IF2 | 2          | Infant feces        | <i>B. longum</i>            | 2.47                         | 58                   | 233153                  | 124210    | 0.0042         | 59.7            | 2127            | 333.9                   | 86.2              | 2                | 76               | 2                  | -                  | Galactooligosaccharide          | BJIC01000001-BJIC01000058 | MCC-01972                                |
| ID02MF1 | 2          | Maternal feces      | <i>B. adolescentis</i>      | 2.29                         | 23                   | 743896                  | 462236    | 0.0011         | 59.3            | 1943            | 342.3                   | 87.3              | 2                | 59               | 1                  | -                  | Galactooligosaccharide          | BJID01000001-BJID01000035 | MCC-01943                                |
| ID02MF2 | 2          | Maternal feces      | <i>B. bifidum</i>           | 2.22                         | 47                   | 232728                  | 118304    | 0.002          | 62.8            | 1868            | 336.4                   | 84.8              | 2                | 55               | 1                  | -                  | Galactooligosaccharide          | BJIE01000001-BJIE01000023 | MCC-01947                                |
| ID02MF3 | 2          | Maternal feces      | <i>B. longum</i>            | 2.45                         | 66                   | 263956                  | 115024    | 0.0027         | 59.9            | 2080            | 336.8                   | 86                | 2                | 77               | 2                  | YCFA               | Galactooligosaccharide          | BJIF01000001-BJIF01000066 | MCC-01975                                |
| ID02OF1 | 2          | Neonatal oral fluid | <i>B. adolescentis</i>      | 2.28                         | 20                   | 1430044                 | 1430044   | 0.0028         | 59.3            | 1952            | 340.6                   | 87.5              | 2                | 59               | 1                  | YCFA               | Galactooligosaccharide          | BJIG01000001-BJIG01000020 | MCC-01941                                |
| ID02OF2 | 2          | Neonatal oral fluid | <i>B. pseudocatenulatum</i> | 2.38                         | 20                   | 757568                  | 505692    | 0.0011         | 56.5            | 1986            | 344.4                   | 86.3              | 3                | 57               | 1                  | YCFA               | Galactooligosaccharide          | BJIH01000001-BJIH01000020 | MCC-01992                                |
| ID03IF1 | 3          | Infant feces        | <i>B. breve</i>             | 2.26                         | 101                  | 255869                  | 212069    | 0.0006         | 58.7            | 1923            | 333.8                   | 85.3              | 1                | 55               | 0                  | -                  | Galactooligosaccharide          | BJII01000001-BJII01000527 | MCC-01950                                |
| ID03OF1 | 3          | Neonatal oral fluid | <i>B. breve</i>             | 2.23                         | 28                   | 335081                  | 219798    | 0.0014         | 58.7            | 1928            | 333.1                   | 86.3              | 1                | 55               | 0                  | -                  | Galactooligosaccharide          | BJIJ01000001-BJIJ01000028 | MCC-01951                                |
| ID05IF1 | 5          | Infant feces        | <i>B. pseudocatenulatum</i> | 2.25                         | 257                  | 81150                   | 15424     | 0.0001         | 56.2            | 1712            | 338.2                   | 77.2              | 1                | 48               | 5                  | -                  | Galactooligosaccharide          | BJIK01000001-BJIK01000257 | MCC-01994                                |
| ID05OF1 | 5          | Neonatal oral fluid | <i>B. pseudocatenulatum</i> | 2.25                         | 96                   | 124875                  | 42605     | 0.0002         | 56.2            | 1800            | 352.4                   | 84.4              | 2                | 51               | 4                  | BM                 | Galactooligosaccharide          | BJIL01000001-BJIL01000096 | MCC-01993                                |
| ID07IF1 | 7          | Infant feces        | <i>B. bifidum</i>           | 2.25                         | 81                   | 304615                  | 178434    | 0.0015         | 62.8            | 1846            | 344.3                   | 84.9              | 2                | 56               | 0                  | -                  | 2'-Fucosyllactose               | BJIM01000001-BJIM01000081 | MCC-02030                                |
| ID07IF2 | 7          | Infant feces        | <i>B. breve</i>             | 2.34                         | 43                   | 316196                  | 127027    | 0.0035         | 58.8            | 2021            | 333.4                   | 86.3              | 2                | 55               | 1                  | -                  | Galactooligosaccharide          | BJIN01000001-BJIN01000043 | MCC-01954                                |
| ID07IF3 | 7          | Infant feces        | <i>B. longum</i>            | 2.33                         | 37                   | 410666                  | 146688    | 0.002          | 59.9            | 1922            | 351.9                   | 87                | 2                | 54               | 1                  | -                  | Galactooligosaccharide          | BJIO01000001-BJIO01000037 | MCC-01976                                |
| ID07OF1 | 7          | Neonatal oral fluid | <i>B. breve</i>             | 2.34                         | 43                   | 316196                  | 127027    | 0.0035         | 58.8            | 2021            | 333.4                   | 86.3              | 2                | 55               | 1                  | BM                 | Galactooligosaccharide          | BJIP01000001-BJIP01000028 | MCC-01953                                |
| ID08IF1 | 8          | Infant feces        | <i>B. breve</i>             | 2.43                         | 24                   | 565698                  | 311771    | 0.0116         | 58.5            | 2143            | 328.7                   | 86.8              | 2                | 55               | 1                  | -                  | Galactooligosaccharide          | BJIQ01000001-BJIQ01000024 | MCC-01957                                |
| ID08IF2 | 8          | Infant feces        | <i>B. longum</i>            | 2.33                         | 39                   | 410576                  | 146434    | 0.0075         | 59.9            | 1918            | 352.7                   | 86.9              | 2                | 53               | 1                  | -                  | Galactooligosaccharide          | BJIR01000001-BJIR01000039 | MCC-01977                                |
| ID08OF1 | 8          | Neonatal oral fluid | <i>B. bifidum</i>           | 2.21                         | 57                   | 215216                  | 96233     | 0.0016         | 62.8            | 1835            | 342.2                   | 85.2              | 2                | 54               | 0                  | -                  | Galactooligosaccharide          | BJIS01000001-BJIS01000057 | MCC-01958                                |
| ID08OF2 | 8          | Neonatal oral fluid | <i>B. breve</i>             | 2.45                         | 39                   | 594361                  | 283907    | 0.004          | 58.4            | 2148            | 328.2                   | 86.3              | 2                | 55               | 1                  | YCFA               | Galactooligosaccharide          | BJIT01000001-BJIT01000039 | MCC-01959                                |
| ID09IF1 | 9          | Infant feces        | <i>B. breve</i>             | 2.33                         | 39                   | 285123                  | 108385    | 0.0018         | 58.8            | 1951            | 342.5                   | 86.2              | 2                | 54               | 1                  | -                  | Galactooligosaccharide          | BJIU01000001-BJIU01000039 | MCC-01963                                |
| ID09IF2 | 9          | Infant feces        | <i>B. longum</i>            | 2.35                         | 170                  | 171627                  | 28382     | 0.006          | 60.1            | 1884            | 342.4                   | 82.3              | 2                | 53               | 4                  | -                  | Galactooligosaccharide          | BJIV01000001-BJIV01000170 | MCC-01978                                |
| ID09OF1 | 9          | Neonatal oral fluid | <i>B. breve</i>             | 2.26                         | 22                   | 405061                  | 162736    | 0.0042         | 58.9            | 1969            | 331.9                   | 86.7              | 1                | 54               | 0                  | BM                 | Galactooligosaccharide          | BJIW01000001-BJIW01000022 | MCC-01961                                |
| ID09OF2 | 9          | Neonatal oral fluid | <i>B. dentium</i>           | 2.6                          | 67                   | 444170                  | 176860    | 0.0085         | 58.6            | 2183            | 347.7                   | 87.5              | 3                | 55               | 1                  | YCFA               | L-(+)-arabinose                 | BJIX01000001-BJIX01000067 | MCC-02031                                |
| ID09OF3 | 9          | Neonatal oral fluid | <i>B. pseudocatenulatum</i> | 2.32                         | 22                   | 899093                  | 287645    | 0.0008         | 56.9            | 1890            | 354.4                   | 86.8              | 3                | 54               | 2                  | YCFA               | Galactooligosaccharide          | BJIY01000001-BJIY01000022 | MCC-01995                                |
| ID10IF1 | 10         | Infant feces        | <i>B. breve</i>             | 2.22                         | 33                   | 605039                  | 264331    | 0.0033         | 58.7            | 1903            | 334.4                   | 85.9              | 2                | 54               | 0                  | -                  | Galactooligosaccharide          | BJJZ01000001-BJJZ01000033 | MCC-01964                                |
| ID11IF1 | 10         | Infant feces        | <i>B. dentium</i>           | 2.6                          | 26                   | 382911                  | 305666    | 0.0068         | 58.5            | 2157            | 352.3                   | 87.6              | 3                | 55               | 4                  | -                  | Galactooligosaccharide          | BJJA01000001-BJJA01000026 | MCC-01970                                |
| ID12IF1 | 12         | Infant feces        | <i>B. breve</i>             | 2.44                         | 43                   | 562774                  | 134058    | 0.0016         | 59.2            | 2174            | 322.6                   | 86.1              | 2                | 75               | 1                  | -                  | Galactooligosaccharide          | BJJB01000001-BJJB01000043 | MCC-01966                                |
| ID12IF2 | 12         | Infant feces        | <i>B. pseudocatenulatum</i> | 2.27                         | 46                   | 424289                  | 353901    | 0.0008         | 56.7            | 1844            | 355.4                   | 86.6              | 1                | 54               | 0                  | -                  | D-(+)-Cellobiose                | BJJC01000001-BJJC01000046 | MCC-02032                                |
| ID12IF3 | 12         | Infant feces        | <i>B. pseudocatenulatum</i> | 2.33                         | 73                   | 335434                  | 115514    | 0.0052         | 56.9            | 1880            | 354.4                   | 85.8              | 3                | 54               | 2                  | -                  | D-(+)-Cellobiose                | BJJD01000001-BJJD01000073 | MCC-02033                                |
| ID12MF1 | 12         | Maternal feces      | <i>B. longum</i>            | 2.53                         | 76                   | 167558                  | 67927     | 0.0014         | 59.9            | 2134            | 341.5                   | 86.3              | 2                | 79               | 3                  | YCFA               | Galactooligosaccharide          | BJJE01000001-BJJE01000076 | MCC-01983                                |
| ID12MF2 | 12         | Maternal feces      | <i>B. pseudocatenulatum</i> | 2.29                         | 83                   | 395652                  | 99812     | 0.0007         | 56.7            | 1844            | 356                     | 86.1              | 2                | 54               | 0                  | BM                 | 2'-Fucosyllactose               | BJJF01000001-BJJF01000083 | MCC-02034                                |
| ID12MF3 | 12         | Maternal feces      | <i>B. pseudocatenulatum</i> | 2.28                         | 77                   | 353658                  | 175534    | 0.0014         | 56.7            | 1844            | 355.7                   | 86.3              | 2                | 54               | 0                  | BM                 | 2'-Fucosyllactose               | BJJG01000001-BJJG01000077 | MCC-02035                                |
| ID12OF1 | 12         | Neonatal oral fluid | <i>B. longum</i>            | 2.54                         | 73                   | 185555                  | 68250     | 0.0028         | 59.9            | 2149            | 339.1                   | 86.2              | 2                | 79               | 3                  | -                  | Galactooligosaccharide          | BJJH01000001-BJJH01000073 | MCC-01979                                |
| ID12OF2 | 12         | Neonatal oral fluid | <i>B. pseudocatenulatum</i> | 2.27                         | 36                   | 293948                  | 134272    | 0.0011         | 56.7            | 1844            | 357.7                   | 87.2              | 2                | 54               | 0                  | BM                 | Galactooligosaccharide          | BJJI01000001-BJJI01000036 | MCC-01996                                |
| ID13IF1 | 13         | Infant feces        | <i>B. breve</i>             | 2.47                         | 28                   | 323794                  | 177651    | 0.0071         | 58.6            | 2171            | 326.2                   | 86.1              | 2                | 77               | 2                  | -                  | Galactooligosaccharide          | BJJJ01000001-BJJJ01000028 | MCC-01967                                |
| ID13IF2 | 13         | Infant feces        | <i>B. breve</i>             | 2.44                         | 274                  | 131186                  | 27827     | 0.0099         | 58.5            | 2022            | 321.4                   | 79.8              | 2                | 54               | 2                  | -                  | L-(+)-arabinose                 | BJJK01000001-BJJK01000274 | MCC-02036                                |
| ID13IF3 | 13         | Infant feces        | <i>B. dentium</i>           | 2.6                          | 67                   | 322579                  | 165925    | 0.0081         | 58.6            | 2182            | 348.1                   | 87.6              | 3                | 55               | 1                  | -                  | L-(+)-arabinose                 | BJJL01000001-BJJL01000022 | MCC-02037                                |
| ID13MF1 | 13         | Maternal feces      | <i>B. breve</i>             | 2.36                         | 219                  | 415273                  | 382788    | 0.0058         | 58.7            | 1979            | 334.8                   | 84.4              | 2                | 54               | 0                  | BM                 | 2'-Fucosyllactose               | BJJM01000001-BJMM01000219 | MCC-02038                                |
| ID13MF2 | 13         | Maternal feces      | <i>B. longum</i>            | 2.38                         | 36                   | 266064                  | 124325    | 0.0031         | 59.8            | 1995            | 346.1                   | 86.9              | 2                | 60               | 0                  | BM                 | Galactooligosaccharide          | BJJN01000001-BJJN01000036 | MCC-01986                                |
| ID13MF3 | 13         | Maternal feces      | <i>B. pseudocatenulatum</i> | 2.23                         | 22                   | 752541                  | 413420    | 0.0045         | 56.2            | 1823            | 355.7                   | 87.2              | 2                | 55               | 1                  | YCFA               | Galactooligosaccharide          | BJJO01000001-BJJO01000022 | MCC-01988                                |
| ID13OF1 | 13         | Neonatal oral fluid | <i>B. breve</i>             | 2.28                         | 74                   | 338849                  | 218389    | 0.0045         | 58.9            | 1980            | 331.3                   | 86.1              | 1                | 54               | 0                  | BM                 | 2'-Fucosyllactose               | BJJP01000001-BJJP01000074 | MCC-02039                                |
| ID13OF2 | 13         | Neonatal oral fluid | <i>B. longum</i>            | 2.38                         | 43                   | 248213                  | 109588    | 0.0029         | 59.8            | 1992            | 345                     | 86.5              | 2                | 58               | 0                  | BM                 | Galactooligosaccharide          | BJJQ01000001-BJJQ01000043 | MCC-01984                                |
| ID13OF3 | 13         | Neonatal oral fluid | <i>B. pseudocatenulatum</i> | 2.23                         | 29                   | 379214                  | 143234    | 0.0004         | 56.2            | 1812            | 356.6                   | 86.9              | 2                | 55               | 1                  | YCFA               | Galactooligosaccharide          | BJJR01000001-BJJR01000029 | MCC-01998                                |
| ID14OF1 | 14         | Neonatal oral fluid | <i>B. longum</i>            | 2.46                         | 46                   | 312578                  | 130152    | 0.0011         | 59.8            | 2153            | 328.9                   | 86.3              | 2                | 56               | 3                  | -                  | Galactooligosaccharide          | BJJS01000001-BJJS01000046 | MCC-01989                                |
| ID14OF2 | 14         | Neonatal oral fluid | <i>B. longum</i>            | 2.38                         | 31                   | 270543                  | 164562    | 0.0061         | 59.8            | 2003            | 344.5                   | 86.8              | 2                | 58               | 0                  | -                  | Galactooligosaccharide          | BJJT01000001-BJJT01000031 | MCC-01990                                |
| ID15IF1 | 15         | Infant feces        | <i>B. breve</i>             | 2.2                          | 26                   | 465231                  | 134114    | 0.0019         | 58.6            | 1900            | 333.5                   | 86.2              | 1                | 55               | 0                  | -                  | Galactooligosaccharide          | BJJU01000001-BJJU01000026 | MCC-01969                                |
| ID15OF1 | 15         | Neonatal oral fluid | <i>B. breve</i>             | 2.26                         | 20                   | 525267                  | 389540    | 0.0016         | 58.9            | 1965            | 332.8                   | 86.8              | 2                | 54               | 0                  | BM                 | Galactooligosaccharide          | BJJV01000001-BJJV01000020 | MCC-01968                                |

**Supplemental Table 4. ANI values for candidate strains.**

| Candidate No. | Label   | Family No. | Isolation Source    | Species                     | ANI Values |
|---------------|---------|------------|---------------------|-----------------------------|------------|
| 1             | ID03IF1 | 3          | Infant feces        | <i>B. breve</i>             | 99.97%     |
|               | ID03OF1 |            | Neonatal oral fluid |                             |            |
| 2             | ID05IF1 | 5          | Infant feces        | <i>B. pseudocatenulatum</i> | 99.95%     |
|               | ID05OF1 |            | Neonatal oral fluid |                             |            |
| 3             | ID07IF2 | 7          | Infant feces        | <i>B. breve</i>             | 99.96%     |
|               | ID07OF1 |            | Neonatal oral fluid |                             |            |
| 4             | ID08IF1 | 8          | Infant feces        | <i>B. breve</i>             | 99.97%     |
|               | ID08OF2 |            | Neonatal oral fluid |                             |            |
| 5             | ID09IF1 | 9          | Infant feces        | <i>B. breve</i>             | 98.19%     |
|               | ID09OF1 |            | Neonatal oral fluid |                             |            |
| 6             | ID12IF2 | 12         | Infant feces        | <i>B. pseudocatenulatum</i> | 99.97%     |
|               | ID12OF2 |            | Neonatal oral fluid |                             |            |
| 7             | ID13IF1 | 13         | Infant feces        | <i>B. breve</i>             | 98.39%     |
|               | ID13OF1 |            | Neonatal oral fluid |                             |            |
| 8             | ID15IF1 | 15         | Infant feces        | <i>B. breve</i>             | 98.78%     |
|               | ID15OB1 |            | Neonatal oral fluid |                             |            |
| 9             | ID02MF1 | 2          | Maternal feces      | <i>B. adolescentis</i>      | 98.75%     |
|               | ID02OF1 |            | Neonatal oral fluid |                             |            |
| 10            | ID12MF1 | 12         | Maternal feces      | <i>B. longum</i>            | 99.95%     |
|               | ID12OF1 |            | Neonatal oral fluid |                             |            |
| 11            | ID12MF2 | 12         | Maternal feces      | <i>B. pseudocatenulatum</i> | 99.96%     |
|               | ID12OF2 |            | Neonatal oral fluid |                             |            |
| 12            | ID13MF3 | 13         | Maternal feces      | <i>B. pseudocatenulatum</i> | 99.97%     |
|               | ID13OF3 |            | Neonatal oral fluid |                             |            |
| 13            | ID13MF2 | 13         | Maternal feces      | <i>B. longum</i>            | 99.99%     |
|               | ID13OF2 |            | Neonatal oral fluid |                             |            |

Supplemental Table 5. Detailed information on the subjects.

| Subject ID | Day         |                                            | Information about infants |                 |                            |                    |                     |                                                  | Information about mothers        |             |                                  |                                     |                                    |                                 |                                | Notes                                                                                             |                                                    |
|------------|-------------|--------------------------------------------|---------------------------|-----------------|----------------------------|--------------------|---------------------|--------------------------------------------------|----------------------------------|-------------|----------------------------------|-------------------------------------|------------------------------------|---------------------------------|--------------------------------|---------------------------------------------------------------------------------------------------|----------------------------------------------------|
|            | Birthday    | Hospital visiting day for 1 month check up | Infant gender             | Body weight (g) |                            | Nutritional status |                     | Medication from birth to first 3-4 weeks of life | Gestational age at birth (weeks) | Blood group | Maternal age at birth (year-old) | Maternal defecation during delivery | Habitually intake of milk products | Habitually intake of probiotics | Use of antimicrobials at birth |                                                                                                   | Drug use during pregnancy                          |
|            |             |                                            |                           | At birth        | At first 3-4 weeks of life | Breastfeeding (%)  | Formula feeding (%) |                                                  |                                  |             |                                  |                                     |                                    |                                 |                                |                                                                                                   |                                                    |
| 1          | 10-Jun-2017 | 18-Jul-2017                                | female                    | 3450            | 3750                       | 75                 | 25                  | -                                                | 40                               | O           | 36                               | -                                   | +                                  | +                               | -                              | Gastrointestinal agents, Laxatives, Antihistamine, Antiallergic agents, Dermatologic preparation  | Meconium staining                                  |
| 2          | 12-Jun-2017 | 18-Jul-2017                                | female                    | 2660            | 3492                       | 50                 | 50                  | -                                                | 38                               | A           | 38                               | +                                   | -                                  | +                               | -                              | Tocolytic agent, Thyroid hormone preparation, Laxatives                                           | Female infertility, multifetal pregnancy reduction |
| 3          | 19-Jun-2017 | 18-Jul-2017                                | female                    | 3510            | 4858                       | 70                 | 30                  | -                                                | 39                               | unknown     | 31                               | -                                   | +                                  | +                               | -                              | -                                                                                                 |                                                    |
| 4          | 19-Jun-2017 | 20-Jul-2017                                | male                      | 3475            | 4396                       | 100                | 0                   | -                                                | 38                               | A           | 35                               | -                                   | +                                  | -                               | +                              | Antihistamine, Antipyretic-analgesics                                                             | BMI16.3, GBS(2+)                                   |
| 5          | 15-Jul-2017 | 17-Aug-2017                                | female                    | 3325            | 4282                       | 80                 | 20                  | -                                                | 39                               | A           | 34                               | -                                   | +                                  | +                               | -                              | Tocolytic agent                                                                                   | Pyelonephritis                                     |
| 6          | 8-Aug-2017  | 12-Sep-2017                                | female                    | 2900            | 3844                       | 70                 | 30                  | -                                                | 41                               | B           | 32                               | +                                   | +                                  | +                               | -                              | Tocolytic agent, Antianemic agent                                                                 |                                                    |
| 7          | 9-Aug-2017  | 13-Aug-2017                                | male                      | 4120            | 5195                       | 100                | 0                   | -                                                | 40                               | O           | 36                               | -                                   | -                                  | -                               | -                              | -                                                                                                 |                                                    |
| 8          | 14-Aug-2017 | 12-Sep-2017                                | male                      | 3110            | 4816                       | 100                | 0                   | -                                                | 39                               | A           | 28                               | -                                   | +                                  | +                               | -                              | Laxatives                                                                                         |                                                    |
| 9          | 15-Aug-2017 | 22-Sep-2017                                | female                    | 2760            | 3484                       | 100                | 0                   | -                                                | 39                               | A           | 28                               | -                                   | +                                  | +                               | -                              | Antianemic agent, Laxatives                                                                       |                                                    |
| 10         | 22-Aug-2017 | 25-Aug-2017                                | female                    | 3280            | 4142                       | 100                | 0                   | -                                                | 39                               | B           | 38                               | -                                   | +                                  | +                               | -                              | -                                                                                                 |                                                    |
| 11         | 24-Aug-2017 | 23-Sep-2017                                | female                    | 2780            | 4052                       | 100                | 0                   | -                                                | 38                               | B           | 31                               | -                                   | -                                  | -                               | -                              | Tocolytic agent, Antianemic agent, Gastric mucosal protection agent                               |                                                    |
| 12         | 30-Aug-2017 | 27-Sep-2017                                | female                    | 3135            | 4398                       | 100                | 0                   | -                                                | 39                               | A           | 37                               | +                                   | -                                  | -                               | +                              | Laxatives, Antipyretic-analgesics, Prophylactic for oral bacterial infection                      |                                                    |
| 13         | 5-Sep-2017  | 8-Sep-2017                                 | male                      | 3595            | 4254                       | 33                 | 67                  | -                                                | 41                               | A           | 28                               | +                                   | +                                  | +                               | +                              | Antianemic agent, Antianemic agent, Gastric mucosal protection agent, Laxatives                   |                                                    |
| 14         | 6-Sep-2017  | 3-Oct-2017                                 | female                    | 2925            | 3970                       | 90                 | 10                  | -                                                | 40                               | O           | 32                               | -                                   | +                                  | -                               | -                              | -                                                                                                 |                                                    |
| 15         | 11-Sep-2017 | 10-Oct-2017                                | male                      | 3480            | 4664                       | 100                | 0                   | -                                                | 38                               | O           | 31                               | -                                   | -                                  | +                               | -                              | Tocolytic agent, Laxatives, Antianemic agent, Gastric mucosal protection agent, Antitussive drugs |                                                    |







**Supplemental Table 8. List of primer sets.**

| Primer     | Target                                             | Sequence (5' to 3')                 | Reference                                                                   |
|------------|----------------------------------------------------|-------------------------------------|-----------------------------------------------------------------------------|
| Tru357F    | V3-V4 region of the 16S rRNA gene                  | CGCTCTTCCGATCTCTGTACGGRAGGCAGCAG    |                                                                             |
| Tru806R    |                                                    | CGCTCTTCCGATCTGACGGACTACHVGGGTWTCTA |                                                                             |
| g-Bifid-F  | <i>Bifidobacterium</i>                             | CTCCTGGAAACGGGTGG                   | <i>Matsuki T et al.</i> , Appl Environ Microbiol. 68, 11, 5445-5451 (2002). |
| g-Bifid-R  |                                                    | GGTGTTCCTCCCGATATCTACA              |                                                                             |
| BiADOG-1a  | <i>Bifidobacterium adolescentis</i> group          | CTCCAGTTGGATGCATGTC                 | <i>Matsuki T et al.</i> , Appl Environ Microbiol. 65, 10, 4506-4512 (1999). |
| BiADOG-1b  |                                                    | TCCAGTTGACCGCATGGT                  |                                                                             |
| BiADOG-2   |                                                    | CGAAGGCTTGCTCCCAGT                  |                                                                             |
| Bflact2    | <i>Bifidobacterium animalis</i> ssp. <i>lactis</i> | GTGGAGACACGGTTTCCC                  | <i>Ventura M et al.</i> , Appl Environ Microbiol. 67, 6, 2760-2765 (2001).  |
| Bflact5    |                                                    | CACACCACACAATCCAATAC                |                                                                             |
| BiBIF-1    | <i>Bifidobacterium bifidum</i>                     | CCACATGATCGCATGTGATTG               | <i>Matsuki T et al.</i> , FEMS Microbiol Lett. 167, 2, 113-121 (1998).      |
| BiBIF-2    |                                                    | CCGAAGGCTTGCTCCCAA                  |                                                                             |
| BiBRE-1    | <i>Bifidobacterium breve</i>                       | CCGGATGCTCCATCACAC                  | <i>Matsuki T et al.</i> , FEMS Microbiol Lett. 167, 2, 113-121 (1998).      |
| BiBRE-2    |                                                    | ACAAAGTGCCTTGCTCCCT                 |                                                                             |
| BiCATg-1   | <i>Bifidobacterium catenulatum</i> group           | CGGATGCTCCGACTCCT                   | <i>Matsuki T et al.</i> , FEMS Microbiol Lett. 167, 2, 113-121 (1998).      |
| BiCATg-2   |                                                    | CGAAGGCTTGCTCCCGAT                  |                                                                             |
| BiDEN-1    | <i>Bifidobacterium dentium</i>                     | ATCCCGGGGGTTCGCCT                   | <i>Matsuki T et al.</i> , Appl Environ Microbiol. 65, 10, 4506-4512 (1999). |
| BiDEN-2    |                                                    | GAAGGGCTTGCTCCCGA                   |                                                                             |
| BiLON-1    | <i>Bifidobacterium longum</i> ssp. <i>longum</i>   | TTCCAGTTGATCGCATGGTC                | <i>Matsuki T et al.</i> , Appl Environ Microbiol. 65, 10, 4506-4512 (1999). |
| BiLON-2    |                                                    | GGGAAGCCGTATCTCTACGA                |                                                                             |
| INF_clpC_F | <i>Bifidobacterium longum</i> ssp. <i>infantis</i> | ACATCCAGGACCGTAACCTG                | In this study                                                               |
| INF_clpC_R |                                                    | GCTTGTGCAGCTCCGTCT                  |                                                                             |
| OPF-09     | RAPD-PCR (primer type 1)                           | CCAAGCTTCC                          |                                                                             |
| OPF-11     | RAPD-PCR (primer type 2)                           | TTGGTACCCC                          |                                                                             |
